# Supplementary material
Source: Springer Nature journal article supplement (https://www.springermedizin.de/resource/supplementary/12889_2013_6522_MOESM9_ESM.pdf/9498030)

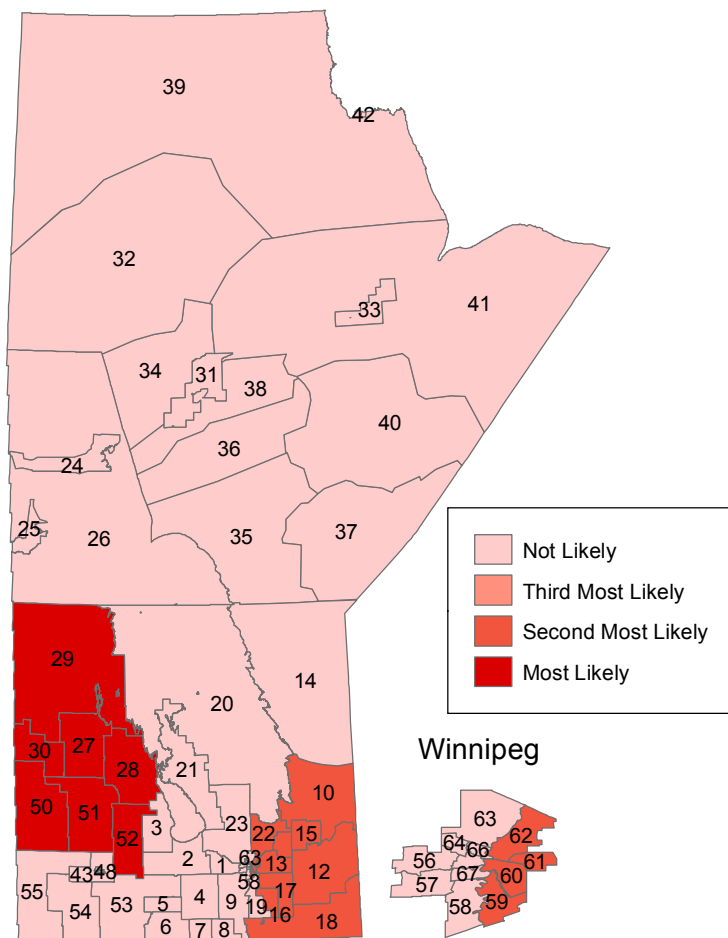

Supplement: MOESM9 [file 9498030]
